# Supplementary material
Source: publisher site journal article supplement (https://www.dovepress.com/article/399920)
Supplement: Supplementary file 1 [file get_supplementary_file.php]

**Supplementary Table**

**Associations of Traumatic Injury with Abnormal Glucose Metabolism: A Population-based Prospective Cohort Study**

Tao Liu, Xin Liu, Yue Li, Aitian Wang, Shuohua Chen, Shouling Wu, Shike Hou, Haojun Fan, Chunxia Cao

**Supplementary Table 1** Baseline characteristics of the participants according to injury severity (mild, moderate, and severe injury)

**Supplementary Table 2** Baseline characteristics of the participants according to injury severity (mild and moderate-severe injury)

**Supplementary Table 3** Association of traumatic injury with abnormal glucose metabolism, IFG, and diabetes - sensitivity analysis

**Supplementary Table 4** Competing risk models for abnormal glucose metabolism, IFG, and diabetes - sensitivity analysis

**Supplementary Figure 1** Kaplan-Meier survival estimates of abnormal glucose metabolism (A, B), IFG (C, D), and diabetes (E, F) according to injury severity. IFG, impaired fasting glucose.

**Supplementary Table 1** Baseline characteristics of the participants according to injury severity (mild, moderate, and severe injury)

| **Varieties** | **Overall**  **(n = 3,830)** | **Control**  **(n = 1,915)** | **Traumatic Injury** | | | ***P*-value** |
| --- | --- | --- | --- | --- | --- | --- |
| **Mild**  **(n = 1,463)** | **Moderate**  **(n = 407)** | **Severe**  **(n = 45)** |
| Age, years, mean (SD) | 43.04±9.57 | 43.04±9.56 | 41.63±9.06 | 47.01±9.18 | 53.02±12.94 | <0.0001* |
| Male, n (%) | 3,172 (82.82) | 1,586 (82.82) | 1,215 (83.05) | 334 (82.06) | 37 (82.22) | 0.9729 |
| Smoke, n (%) |  |  |  |  |  | 0.4566 |
| Current | 1,516 (39.58) | 770 (40.21) | 562 (38.41) | 166 (40.79) | 18 (40.00) |  |
| Former | 180 (4.70) | 76 (3.97) | 80 (5.47) | 21 (5.16) | 3 (6.67) |  |
| Never | 2,134 (55.72) | 1,069 (55.82) | 821 (56.12) | 220 (54.05) | 24 (53.33) |  |
| Drink, n (%) |  |  |  |  |  | 0.0016* |
| Current | 1,418 (37.02) | 689 (35.98) | 566 (38.69) | 152 (37.35) | 11 (24.45) |  |
| Former | 299 (7.81) | 181 (9.45) | 91 (6.22) | 21 (5.16) | 6 (13.33) |  |
| Never | 2,113 (55.17) | 1,045 (54.57) | 806 (55.09) | 234 (57.49) | 28 (62.22) |  |
| Physical activity, n (%) |  |  |  |  |  | 0.1228 |
| Yes | 389 (10.16) | 182 (9.50) | 149 (10.18) | 50 (12.29) | 8 (17.78) |  |
| No | 3,441 (89.84) | 1,733 (90.50) | 1,314 (89.82) | 357 (87.71) | 37 (82.22) |  |
| SBP, mmHg, mean (SD) | 126.12±18.50 | 125.31±17.80 | 126.44±19.26 | 128.87±18.98 | 125.47±16.45 | 0.0044* |
| DBP, mmHg, mean (SD) | 82.44±11.20 | 82.53±11.19 | 82.01±11.28 | 83.68±11.02 | 80.97±10.25 | 0.0448* |
| TG, mmol/L, mean (SD) | 1.60±1.32 | 1.57±1.24 | 1.62±1.44 | 1.69±1.23 | 1.59±1.18 | 0.3801 |
| HDL-C, mmol/L, mean (SD) | 1.45 (1.23-1.70) | 1.43 (1.21-1.66) | 1.49 (1.26-1.75) | 1.46 (1.26-1.72) | 1.59 (1.29-1.72) | <0.0001* |
| LDL-C, mmol/L, mean (SD) | 2.39 (1.89-2.85) | 2.39 (1.92-2.85) | 2.39 (1.86-2.84) | 2.41 (1.82-2.86) | 2.40 (1.63-2.95) | 0.5060 |
| FBG, mmol/L, mean (SD) | 5.00 (4.60-5.40) | 5.00 (4.62-5.40) | 4.96 (4.56-5.38) | 5.00 (4.60-5.33) | 4.86 (4.40-5.21) | 0.0847 |
| Weight, kg, mean (SD) | 70.54±10.82 | 71.06±10.67 | 69.82±10.93 | 70.97±11.07 | 67.64±9.51 | 0.0019* |
| BMI, kg/m2, mean (SD) | 24.76±3.28 | 24.84±3.21 | 24.59±3.34 | 25.07±3.38 | 24.10±2.82 | 0.0141* |
| WC, cm, mean (SD) | 86.12±9.77 | 86.05±9.79 | 85.92±9.83 | 87.10±9.55 | 86.82±8.97 | 0.1710 |
| HC, cm, mean (SD) | 96.78±9.45 | 96.72±9.37 | 96.65±9.50 | 97.46±9.44 | 97.42±11.14 | 0.4499 |
| WHR, mean (SD) | 0.89±0.07 | 0.89±0.07 | 0.89±0.07 | 0.89±0.06 | 0.89±0.06 | 0.6970 |
| FHD, n (%) |  |  |  |  |  | 0.7314 |
| Yes | 175 (4.57) | 92 (4.80) | 62 (4.24) | 20 (4.91) | 1 (2.22) |  |
| No | 3,655 (95.43) | 1,823 (95.20) | 1,401 (95.76) | 387 (95.09) | 44 (97.78) |  |

**Notes:** Data are presented as mean ± SD, median (interquartile range) or percentages. **P-value* < 0.05.

**Abbreviations:** SBP, systolic blood pressure; DBP, diastolic blood pressure; TG, triglyceride; HDL-C, high-density lipoprotein cholesterol; LDL-C, low-density lipoprotein cholesterol; FBG, fasting blood glucose; BMI, body mass index; WC, waist circumference; HC, hip circumference; WHR, waist-to-hip ratio; FHD, family history of diabetes.

**Supplementary Table 2** Baseline characteristics of the participants according to injury severity (mild and moderate-severe injury)

| **Varieties** | **Overall**  **(n = 3,830)** | **Control**  **(n = 1,915)** | **Traumatic Injury** | | ***P*-value** |
| --- | --- | --- | --- | --- | --- |
| **Mild**  **(n= 1,463)** | **Moderate-Severe**  **(n = 452)** |
| Age, years, mean (SD) | 43.04±9.57 | 43.04±9.56 | 41.63±9.06 | 47.61±9.77 | <0.0001* |
| Male, n (%) | 3,172 (82.82) | 1,586 (82.82) | 1,215 (83.05) | 371 (82.08) | 0.8923 |
| Smoke, n (%) |  |  |  |  | 0.2395 |
| Current | 1,516 (39.58) | 770 (40.21) | 562 (38.41) | 184 (40.71) |  |
| Former | 180 (4.70) | 76 (3.97) | 80 (5.47) | 24 (5.31) |  |
| Never | 2,134 (55.72) | 1,069 (55.82) | 821 (56.12) | 244 (53.98) |  |
| Drink, n (%) |  |  |  |  | 0.0032* |
| Current | 1,418 (37.02) | 689 (35.98) | 566 (38.69) | 163 (36.06) |  |
| Former | 299 (7.81) | 181 (9.45) | 91 (6.22) | 27 (5.97) |  |
| Never | 2,113 (55.17) | 1,045 (54.57) | 806 (55.09) | 262 (57.96) |  |
| Physical activity, n (%) |  |  |  |  | 0.1086 |
| Yes | 389 (10.16) | 182 (9.50) | 149 (10.18) | 58 (12.83) |  |
| No | 3,441 (89.84) | 1,733 (90.50) | 1,314 (89.82) | 394 (87.17) |  |
| SBP, mmHg, mean (SD) | 126.12±18.50 | 125.31±17.80 | 126.44±19.26 | 128.53±18.75 | 0.0056* |
| DBP, mmHg, mean (SD) | 82.44±11.20 | 82.53±11.19 | 82.01±11.28 | 83.41±10.96 | 0.0581 |
| TG, mmol/L, mean (SD) | 1.60±1.32 | 1.57±1.24 | 1.62±1.44 | 1.68±1.22 | 0.2379 |
| HDL-C, mmol/L, mean (SD) | 1.45 (1.23-1.70) | 1.43 (1.21-1.66) | 1.49 (1.26-1.75) | 1.47 (1.27-1.72) | <0.0001* |
| LDL-C, mmol/L, mean (SD) | 2.39 (1.89-2.85) | 2.39 (1.92-2.85) | 2.39 (1.86-2.84) | 2.41 (1.80-2.89) | 0.3224 |
| FBG, mmol/L, mean (SD) | 5.00 (4.60-5.40) | 5.00 (4.62-5.40) | 4.96 (4.56-5.38) | 4.99 (4.59-5.33) | 0.0340* |
| Weight, kg, mean (SD) | 70.54±10.82 | 71.06±10.67 | 69.82±10.93 | 70.64±10.96 | 0.0040* |
| BMI, kg/m2, mean (SD) | 24.76±3.28 | 24.84±3.21 | 24.59±3.34 | 24.97±3.34 | 0.0301* |
| WC, cm, mean (SD) | 86.12±9.77 | 86.05±9.79 | 85.92±9.83 | 87.07±9.48 | 0.0829 |
| HC, cm, mean (SD) | 96.78±9.45 | 96.72±9.37 | 96.65±9.50 | 97.46±9.61 | 0.2667 |
| WHR, mean (SD) | 0.89±0.07 | 0.89±0.07 | 0.89±0.07 | 0.89±0.06 | 0.4889 |
| FHD, n (%) |  |  |  |  | 0.7346 |
| Yes | 175 (4.57) | 92 (4.80) | 62 (4.24) | 21 (4.65) |  |
| No | 3,655 (95.43) | 1,823 (95.20) | 1,401 (95.76) | 431 (95.35) |  |

**Notes:** Data are presented as mean ± SD, median (interquartile range) or percentages. **P-value* < 0.05.

**Abbreviations:** SBP, systolic blood pressure; DBP, diastolic blood pressure; TG, triglyceride; HDL-C, high-density lipoprotein cholesterol; LDL-C, low-density lipoprotein cholesterol; FBG, fasting blood glucose; BMI, body mass index; WC, waist circumference; HC, hip circumference; WHR, waist-to-hip ratio; FHD, family history of diabetes.

**Supplementary Table 3** Association of traumatic injury with abnormal glucose metabolism, IFG, and diabetes - sensitivity analysis

| **Outcomes** | **Injury severity** | **Events** | **HR (95% CI)a** | ***P*-value** |
| --- | --- | --- | --- | --- |
| Abnormal glucose metabolism | | | | |
|  | Control | 432 | Reference | Reference |
|  | Traumatic injury | 511 | 1.32 (1.16, 1.50) | <0.0001* |
|  | Mild | 388 | 1.32 (1.15, 1.51) | 0.0001* |
|  | Moderate-severe | 123 | 1.33 (1.08, 1.63) | 0.0064* |
| IFG | | | | |
|  | Control | 361 | Reference | Reference |
|  | Traumatic injury | 428 | 1.30 (1.13, 1.49) | 0.0064* |
|  | Mild | 324 | 1.29 (1.11, 1.50) | 0.0062* |
|  | Moderate-severe | 104 | 1.32 (1.06, 1.65) | 0.1891 |
| Diabetes | | | | |
|  | Control | 139 | Reference | Reference |
|  | Traumatic injury | 175 | 1.37 (1.09, 1.71) | 0.0003* |
|  | Mild | 136 | 1.40 (1.10, 1.78) | 0.0011* |
|  | Moderate-severe | 39 | 1.28 (0.89, 1.83) | 0.0137* |

**Notes:** aAdjusted for age, sex, FHD, smoke, drink, physical activity, WHR, SBP, DBP, TG, LDL-C, and HDL-C. **P-value* < 0.05.

**Abbreviations:** HR, hazard ratio; CI, confidence interval; FHD, family history of diabetes; WHR, waist-to-hip ratio; SBP, systolic blood pressure; DBP, diastolic blood pressure; TG, triglyceride; LDL-C, low-density lipoprotein cholesterol; HDL-C, high-density lipoprotein cholesterol.

**Supplementary Table 4** Competing risk models for abnormal glucose metabolism, IFG, and diabetes - sensitivity analysis

| Outcomes | Injury severity | HR (95% CI) | | | | |
| --- | --- | --- | --- | --- | --- | --- |
| Unadjusted | Model 1 | Model 2 | Model 3 | Model 4 |
| Abnormal glucose metabolism | | | | | | |
|  | Control | Reference | Reference | Reference | Reference | Reference |
|  | Traumatic injury | 1.26 (1.12, 1.43) | 1.26 (1.12, 1.43) | 1.26 (1.12, 1.43) | 1.26 (1.11, 1.42) | 1.28 (1.13, 1.46) |
|  | Mild | 1.24 (1.09, 1.42) | 1.27 (1.11, 1.46) | 1.27 (1.11, 1.46) | 1.26 (1.10, 1.45) | 1.29 (1.13, 1.48) |
|  | Moderate-severe | 1.34 (1.10, 1.63) | 1.24 (1.01, 1.51) | 1.24 (1.01, 1.51) | 1.23 (1.01,1.51) | 1.27 (1.04,1.55) |
| IFG | | | | | | |
|  | Control | Reference | Reference | Reference | Reference | Reference |
|  | Traumatic injury | 1.25 (1.09, 1.43) | 1.25 (1.09, 1.43) | 1.25 (1.09, 1.43) | 1.24 (1.08, 1.42) | 1.26 (1.10, 1.45) |
|  | Mild | 1.23 (1.06, 1.42) | 1.26 (1.08, 1.45) | 1.26 (1.08, 1.45) | 1.24 (1.07, 1.44) | 1.26 (1.09, 1.47) |
|  | Moderate-severe | 1.32 (1.07, 1.54) | 1.22 (0.98, 1.52) | 1.22 (0.98, 1.52) | 1.21 (0.98, 1.51) | 1.24 (1.00, 1.54) |
| Diabetes | | | | | | |
|  | Control | Reference | Reference | Reference | Reference | Reference |
|  | Traumatic injury | 1.29 (1.04, 1.60) | 1.30 (1.05, 1.61) | 1.30 (1.05, 1.61) | 1.30 (1.05, 1.62) | 1.33 (1.07, 1.65) |
|  | Mild | 1.27 (1.01, 1.60) | 1.31 (1.04, 1.65) | 1.32 (1.05, 1.66) | 1.32 (1.04, 1.66) | 1.34 (1.06, 1.69) |
|  | Moderate-severe | 1.36 (0.97, 1.91) | 1.24 (0.88, 1.74) | 1.23 (0.88, 1.74) | 1.26 (0.89,1.78) | 1.29 (0.91,1.81) |

**Notes:** Model 1: Adjusted for age and sex. Model 2: Adjusted for age, sex, and FHD. Model 3: Adjusted for age, sex, FHD, smoke, drink, physical activity, and WHR. Model 4: Adjusted for age, sex, FHD, smoke, drink, physical activity, WHR, SBP, DBP, TG, LDL-C, and HDL-C.

**Abbreviations:** HR, hazard ratio; CI, confidence interval; FHD, family history of diabetes; WHR, waist-to-hip ratio; SBP, systolic blood pressure; DBP, diastolic blood pressure; TG, triglyceride; LDL-C, low-density lipoprotein cholesterol; HDL-C, high-density lipoprotein cholesterol.

**
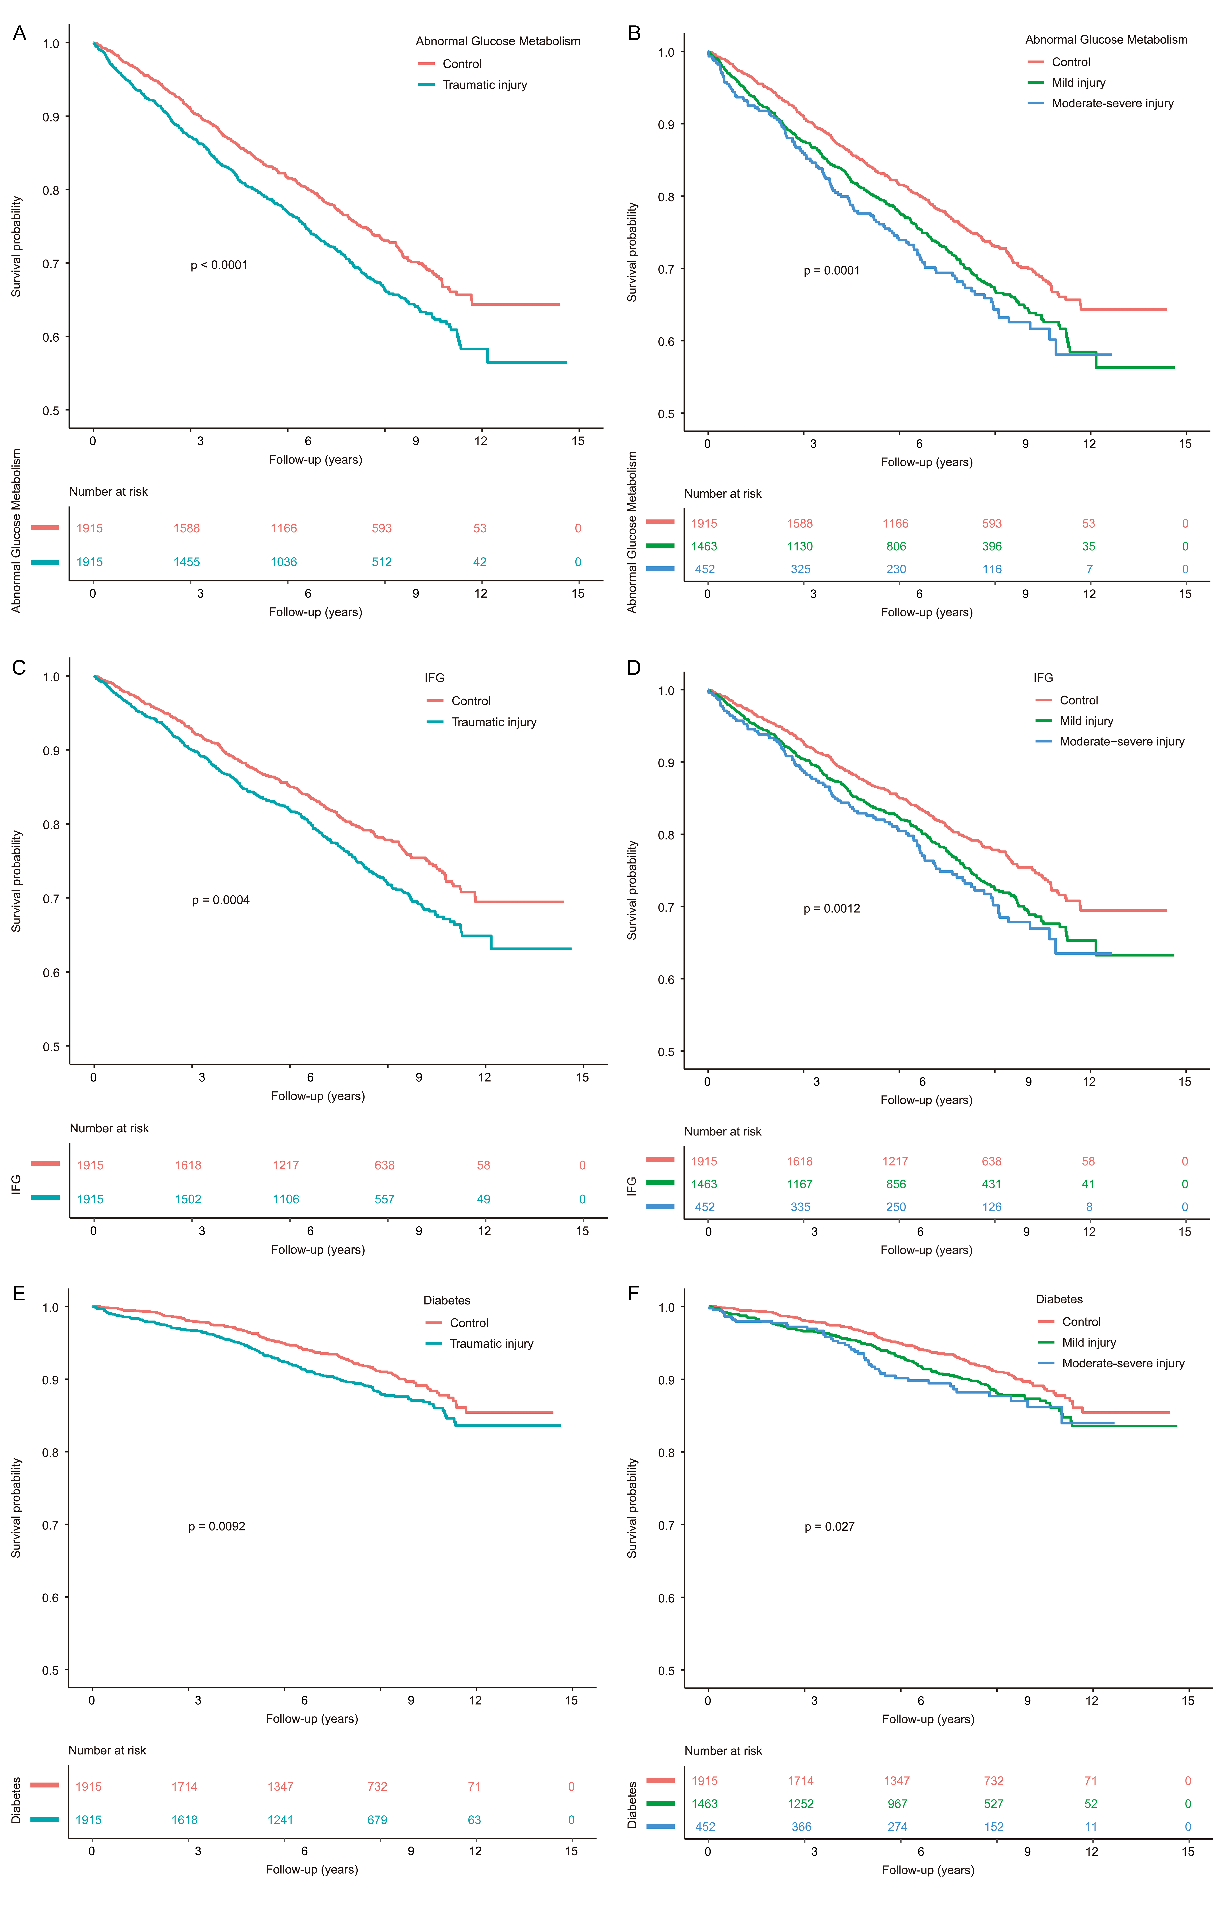
**

**Supplementary Figure 1** Kaplan-Meier survival estimates of abnormal glucose metabolism (A, B), IFG (C, D), and diabetes (E, F) according to injury severity. IFG, impaired fasting glucose.
